# Genetics of phosphorus use efficiency in a MAGIC wheat population grown in the field

Anton P. Wasson<sup>a1</sup>, Alexander B. Zwart<sup>b</sup>, Arunas P. Verbyla<sup>c</sup>, Gilbert Permalloo<sup>a</sup>, Chandrakumara Weligama<sup>a</sup>, Peter R. Ryan<sup>a</sup>, Emmanuel Delhaize<sup>ad</sup>.

<sup>a</sup>CSIRO Agriculture and Food, Canberra, ACT, Australia; <sup>b</sup>CSIRO Data61, Canberra, ACT, Australia; <sup>c</sup>CSIRO Data61, Atherton, QLD, Australia; <sup>d</sup>current address Research School of Biology, Australian National University, Canberra, ACT, Australia.

<sup>1</sup>To whom correspondence should be addressed. E-mail: [anton.wasson@csiro.au](mailto:anton.wasson@csiro.au)

## 1 Highlight:

2 Identification of genetic loci for phosphorus use efficiency in a multigenic population of Australian  
3 wheats grown on contrasting soils.

## 4 Abstract:

5 Phosphorus (P) is an essential plant nutrient and regular applications are essential in most farming  
6 systems to maintain high yields. Yet the P fertilizers applied to crops and pastures are derived from  
7 non-renewable resources. It is therefore important to find agronomic and genetic strategies for using  
8 this resource efficiently, especially since only a proportion of the applied P is absorbed by crops. The  
9 aim of this study was to identify Quantitative Trait Loci (QTL) for P use efficiency (PUE) in wheat using  
10 a Multiparent Advanced Generation InterCross (MAGIC) population grown in the field. The 357  
11 genotypes were arranged in paired plots with and without P fertilization. Yield and biomass were  
12 measured and PUE was calculated as either the performance of the genotype relative to the average  
13 response to fertilization, or the performance of the genotype relative to the average resilience in the  
14 absence of fertilization. Five trials were conducted over three years in Australia at three sites with  
15 contrasting clay and sandy soil types.

16 Genotypic variation for response and resilience were identified in all trials with moderate to strong  
17 correlation with productivity with and without P between trials. Multiparent Whole Genome Average  
18 Interval Mapping (WGAIM) QTL analyses were conducted on the four traits (Biomass / Yield × P  
19 Response / Resilience) across the five trials and identified 130 QTL in total. QTL within 10 cM of each  
20 other were clustered into 56 groups that were likely to represent identical or linked loci. Of the clusters  
21 27 (48%) contained only a single QTL but 17 (31%) contained 3 or more in different trials or traits. This  
22 suggests multiple biological mechanisms driving PUE in different environments. Eight of the 56 groups  
23 collocated with QTL for seedling root hair length identified in the same MAGIC population in an earlier  
24 study.

25 **Keywords:** phosphorus, phosphorus use efficiency, wheat, QTL, MAGIC, root hairs.

26 **Abbreviations:** Best Linear Unbiased Predictors (BLUPs); Doubled Haploid (DH); Inorganic Phosphate  
27 (Pi); Light Detection and Ranging (LIDAR); Multi-Environment Trial (MET); Multiparent Advanced  
28 Generation InterCross (MAGIC); Phosphorus (P); P use efficiency (PUE); Quantitative Trait Loci (QTL);  
29 Recombinant Inbred Line (RIL); Whole Genome Average Interval Mapping (WGAIM)

30 **Running Title:** Genetics of PUE in MAGIC wheat population in the field.

## 32 Introduction:

33 Phosphorus (P) is an essential macronutrient critical for many molecules and processes including  
34 nucleic acids, phospholipids, ATP, and phosphorylation reactions (Vance *et al.*, 2003). P fertilizer is  
35 widely applied in Australia where soils are typically low in plant-available P. In 2016/17 2.4 MT of P  
36 fertilizers were applied to 23.8 million ha of land in Australia (Australian Bureau of Statistics, 2018). P  
37 fertilizers are a non-renewable resource because a large fraction of the world's supply is derived from  
38 a few large deposits of rock phosphate. The input costs associated with the production and delivery  
39 of P fertilizers are also rising and increasingly erode the profitability of crop production. The over-use  
40 of P fertilizers can lead to significant environmental harm as P enters waterways through soil erosion  
41 or leaching (Sharpley *et al.*, 2001; Ulén *et al.*, 2007). Hence improving the efficiency of P uptake and  
42 utilization by crops are important goals for breeders.

43 Plants absorb P from the soil as soluble inorganic phosphate (Pi), mainly  $\text{H}_2\text{PO}_4^-$  (Bielecki, 1973; Ullrich-  
44 Eberius *et al.*, 1984; Sakano, 1990; Schachtman *et al.*, 1998). However, the concentration of soluble Pi  
45 in soils is often very low because Pi is rapidly adsorbed onto mineral surfaces, incorporated into  
46 organic compounds or bound by cations (e.g.  $\text{Fe}^{2+}$ ,  $\text{Al}^{3+}$ ,  $\text{Ca}^{2+}$ ) to form poorly soluble complexes.  
47 Consequently, Pi is poorly mobile and tends to accumulate in the upper layers of the soil. The  
48 absorption of Pi by plants can be limited by its slow rate of diffusion towards the root (Shen *et al.*,  
49 2011). Isotopic studies indicate that as little as 9-23% of applied Pi is utilized by wheat in the year of  
50 application (McLaughlin and Alston, 1986; Sharpley, 1986; McLaughlin *et al.*, 1988). These sparingly-  
51 available pools of P can be accessed by crops in subsequent years (Simpson *et al.* 2011) especially if  
52 plants have mechanisms to increase their solubility or to mine a greater volume of soil.

53 Traits that improve the efficiency with which plants use Pi relate to Pi uptake, P utilization or P  
54 signalling pathways (Bovill *et al.*, 2013). Therefore phosphorus-use efficiency (PUE) can be defined in  
55 various ways and at various scales depending on the constraints that restrict the uptake of Pi or its  
56 conversion into harvestable product. Pi uptake is influenced by root system architecture, symbiotic  
57 relationships with arbuscular mycorrhizal fungi, root exudates that improve P mobilisation in the soil,  
58 the expression of Pi transporters in the roots and xylem loading. An idiosyncratic root system architecture  
59 for maximizing Pi uptake might include shallow roots to enhance topsoil foraging, adventitious axial  
60 roots, more lateral roots and branching, and long root hairs. By contrast, traits that affect utilization  
61 enable plants to more efficiently convert the Pi absorbed into biomass and grain by recycling,  
62 remobilizing, and translocating the Pi to the most important tissues and prioritising metabolic  
63 processes. All these processes are controlled by signalling pathways that function at multiple levels  
64 including through gene expression with miRNAs and transcription factors; through protein  
65 modification (kinases, ubiquitination); and through sugar signalling.

66 Consequently, the benefit of one strategy for improving PUE over another strategy depends on the  
67 nature of the constraint in each environment. Traits that improve Pi uptake efficiency will be more  
68 important for highly Pi-fixing soils (Manske *et al.*, 2001), whereas traits that improve Pi utilisation  
69 efficiency will be more useful on soils where P availability is not limiting. Genetics and traits that  
70 improve PUE in an environment with one type of constraint may be of little benefit in another  
71 environment with a different constraint. Genetics and traits may even counteract each other since  
72 uptake and utilization can sometimes be negatively correlated (Wissuwa *et al.*, 1998; Su *et al.*, 2009;  
73 Rose *et al.*, 2011).

74 Varietal differences in the efficiency of nutrient uptake have interested researchers for many years,  
75 with studies on the “phosphorus feeding capacity” of maize genotypes appearing as early as 1936  
76 (Lyness, 1936). Bovill *et al.* (2013) suggested that breeding for yield potential under high P fertilizer

77 rates would passively increase PUE and there is some evidence that this occurs (Batten, 1992; Ortiz-  
78 Monasterio R. *et al.*, 1997; Egle *et al.*, 1999). Nevertheless, it is likely that PUE can be improved still  
79 further by targeted breeding for specific traits.

80 Most genetic studies of PUE in wheat have used biparental populations in pot trials or hydroponic  
81 experiments and relatively few incorporated full-season field trials. Furthermore, most used winter  
82 wheats and low-density genetic maps. Nevertheless, these reports provide a useful basis for further  
83 work.

84 Su *et al.* (2006) identified 39 QTL for “P deficiency tolerance” in a pot trial by screening a doubled  
85 haploid (DH) population generated from Lovrin10 and Chinese Spring parents. Three major QTL  
86 clusters were identified on chromosomes 4B, 5A, and 5D, the latter two being linked with the  
87 vernalisation genes *Vrn-A1* and *Vrn-D1*. The winter alleles of *VRN1* genes on 5A, 5B, and 5D were later  
88 implicated in shallower root angles in wheat (Voss-Fels *et al.*, 2018). Su *et al.* (2009) subsequently  
89 performed pot experiments and field trials using DH lines from winter wheat parents Hanxuan 10 and  
90 Lumai 14. They measured P uptake and biomass in different P treatments and detected a total of 195  
91 QTL, seven of which were strongly linked with uptake efficiency and six with utilization efficiency. P  
92 uptake efficiency tended to be negatively correlated with utilisation efficiency in that study and only  
93 two loci on 3A and 3B positively influenced both traits.

94 Guo *et al.* (2012) used hydroponic experiments to estimate nutrient-use efficiency for N, P, and K in a  
95 set of recombinant inbred lines (RILs) of winter wheat (Chuan 35050 and Shannong 483). Of the 380  
96 QTLs detected almost half co-located in 10 clusters some of which were associated with improved  
97 uptake and utilisation of all three nutrients. Zhang and Wang (2015) also used hydroponics to score  
98 three sets of RILs for a range of traits. They identified 110 QTL with 28 of the major QTL falling into 18  
99 clusters. Yuan *et al.* (2017) studied a range of traits on seedlings and mature plants in 184 RILs  
100 (TN18/LM6) in hydroponic screens and field trials at low and high P. A total of 163 QTL were identified,  
101 many of which co-located into 10 clusters on chromosomes 1A, 1D, 4B, 5D, 6A, and 6B. PUE was  
102 strongly correlated with various measures of biomass and yield in seedlings and mature plants and  
103 the authors concluded that some simple morphological indexes could be used by breeders to evaluate  
104 PUE on a large-scale.

105 Ryan *et al.* (2015) screened two biparental populations for biomass in a series of glasshouse  
106 experiments using a highly P-fixing soil. Seven significant QTL were identified from a set of RILs (Chuan  
107 Mai 18/ Vigour 18), with the largest on 7A, and nine QTL were detected in a DH population (Kukri/Janz)  
108 with two located on chromosomes 4B and 4D (likely *Rht-B1a* and *Rht-D1a*) accounting for 25% of the  
109 total variance. The authors concluded that early vigour contributed positively to PUE in both  
110 populations.

111 Yang *et al.* (2021) screened a DH population, derived from Yangmai 16 and Zhongmei 895, for seedling  
112 root and biomass traits in hydroponics in zero, low, and high P conditions. Using a ~10 k marker linkage  
113 map they identified 34 QTL in 7 clusters with pleiotropic effects on traits including root length, the  
114 number of root tips, and root surface area.

115 The aim of the present study was to identify QTL for ‘P responsiveness’ and ‘P resilience’ in wheat,  
116 both of which are independent of the standard measures of productivity, biomass and grain yield. The  
117 benefit of being independent of absolute productivity at a given P level is that any QTL identified are  
118 likely to be specific for PUE. Explanations for these traits are provided later.

119 We used a Multiparent Advanced Generation InterCross (MAGIC) population constructed from four  
120 successful Australian cultivars from different regions of the Australian wheatbelt (Huang *et al.*, 2012,

121 2013). The MAGIC methodology enables the identification of many small effect QTL and is well-suited  
122 for studying PUE at multiple sites across Australia. The same population has previously been used to  
123 identify QTL for hair length (Delhaize *et al.*, 2015), coleoptile and seedling growth (Rebetzke *et al.*,  
124 2014), paired spikelet formation (Boden *et al.*, 2015), grain dormancy (Barrero *et al.*, 2015), and  
125 canopy architecture (Richards *et al.*, 2019). Some of these traits may also affect nutrient efficiency.  
126 For instance, long root hairs have been identified as a PUE trait in controlled environment studies  
127 (Gahoonia and Nielsen, 1997, 2003), and simulations suggest root hairs may be responsible for 50%  
128 of plant P uptake (Ruiz *et al.*, 2020).

## 129 Methods

### 130 Plant material

131 The MAGIC population was constructed from four Australian wheat cultivars (Baxter, Chara, Westonia,  
132 and Yitpi) grown in different regions of the Australian wheatbelt. Used in conjunction with a high-  
133 density genetic map and a 90K single nucleotide polymorphism (SNP) chip (Cavanagh *et al.*, 2013;  
134 Wang *et al.*, 2014) it is specifically designed for mapping many small-effect QTL (Huang *et al.*, 2012,  
135 2013). Our trials used a subset of the population comprised of 357 semi-dwarf genotypes (Huang *et al.*  
136 *et al.*, 2013) which were chosen to maximise allelic diversity. All genotypes in the population carried the  
137 *Rht-B1* or *Rht-D1* alleles and excluded tall and double-dwarf genotypes. Another group of wheat  
138 cultivars were included in the trials (usually 11 to 17) to calibrate the measurements of biomass  
139 between quadrat sampling and Light Detection and Ranging (LIDAR) instruments.

### 140 Field Trials

141 Trials were conducted on farmers' fields at Ardlethan in New South Wales (NSW), Wallaroo in the  
142 Australian Capital Territory (ACT), and York in Western Australia (WA) (Table 1). The sites were  
143 identified as being P responsive for wheat growth as determined with a bioassay, with plant available  
144 P measured using the Colwell P assay (Colwell, 1963). For the bioassay rows of wheat seedlings (cv.  
145 Scepter) were sown into a tray of topsoil (0-10 cm depth) with and without triple superphosphate  
146 (19% P; 100 mg kg<sup>-1</sup> P where applied). They were grown in the glasshouse for 10 days and then seedling  
147 size was assessed to establish if there was a response to P fertilization.

148 In the field, genotypes were sown in paired plots with and without the P fertilizer treatment (0 and 30  
149 kg P ha<sup>-1</sup> respectively), applied as triple superphosphate which was added with the seed in runs of the  
150 plot seeder at sowing. The two P treatments were randomised to the runs within each successive pair  
151 of runs across the trial. Genotypes were randomised to the plots within each pair of plots formed by  
152 the intersection of 'run pairs' with ranges. The full set of genotype × treatment combinations were  
153 replicated across two blocks in each trial. The optimal randomisations for these designs were  
154 produced using the 'od' statistical software package (Butler 2019; Butler 2013) in the R statistical  
155 computing environment.

156 Table 1. Site Details

|                                        | Ardlethan (NSW)                                                                                   |             | Walleroo (ACT)                                                                                     | York (WA)                                                                                             |             |
|----------------------------------------|---------------------------------------------------------------------------------------------------|-------------|----------------------------------------------------------------------------------------------------|-------------------------------------------------------------------------------------------------------|-------------|
| <b>Soil type</b>                       | Clay                                                                                              |             | Clay                                                                                               | Sand over Clay/Loam                                                                                   |             |
| <b>Phosphate Buffering Index (PBI)</b> | 71 (Low)                                                                                          |             | 50 (Very low)                                                                                      | 28 (Very very low)                                                                                    |             |
| <b>Sowing Configuration</b>            | 6 m plots (5 m harvested). 100 plants/m <sup>2</sup> target. 6 rows, 0.33 m spacing, 2 m centres. |             | 4 m plots (3 harvested). 180 plants/m <sup>2</sup> target. 10 rows, 0.18 m spacing, 2.2 m centres. | 6 m plots (4 m harvested). 120 plants/m <sup>2</sup> target. 6 rows, 0.254 m spacing, 1.75 m centres. |             |
|                                        | 2017                                                                                              | 2018        | 2018                                                                                               | 2017                                                                                                  | 2018        |
| <b>Latitude</b>                        | -34.142081°                                                                                       | -34.134528° | -35.174990°                                                                                        | -31.939802°                                                                                           | -31.940146° |
| <b>Longitude</b>                       | 146.854074°                                                                                       | 146.855161° | 149.044366°                                                                                        | 116.898947°                                                                                           | 116.903877° |
| <b>Sowing Date</b>                     | 2017-05-23                                                                                        | 2018-06-05  | 2018-06-13                                                                                         | 2017-06-06                                                                                            | 2018-06-08  |
| <b>Harvest Date</b>                    | 2017-11-23                                                                                        | 2018-12-01  | 2018-12-19                                                                                         | 2018-12-14                                                                                            | 2018-12-17  |
| <b>pH</b>                              | 4.6                                                                                               | 5.3         | 4.7                                                                                                | 5.1                                                                                                   | 4.6         |
| <b>Colwell P (0-10 cm)</b>             | 13.2                                                                                              | 24.8        | 12.0                                                                                               | 25.7                                                                                                  | 30.0        |

157 Further details of the trials are found in Table 1. Nitrogen was supplied as urea prior to sowing and  
 158 was top-dressed again at stem elongation with urea (timed with rainfall), or liquid N fertilizers (e.g.  
 159 urea and ammonium nitrate liquid formulations - UAN). Muriate and sulphate of potash (KCl and  
 160 K<sub>2</sub>SO<sub>4</sub>) were applied as required to ensure adequate K and S, as were micronutrients. Foliar diseases  
 161 were managed with prophylactic fungicide and pesticide applications. Weeds were managed with  
 162 district herbicide application practices at the recommended rates.

163 The trial at York in 2017 was affected by *Rhizoctonia*. Damage to the plots was scored and the data  
 164 used as a covariate in the spatial model of the trial to remove the effect on productivity. Affected parts  
 165 of the plots were excluded from the measurement of biomass.

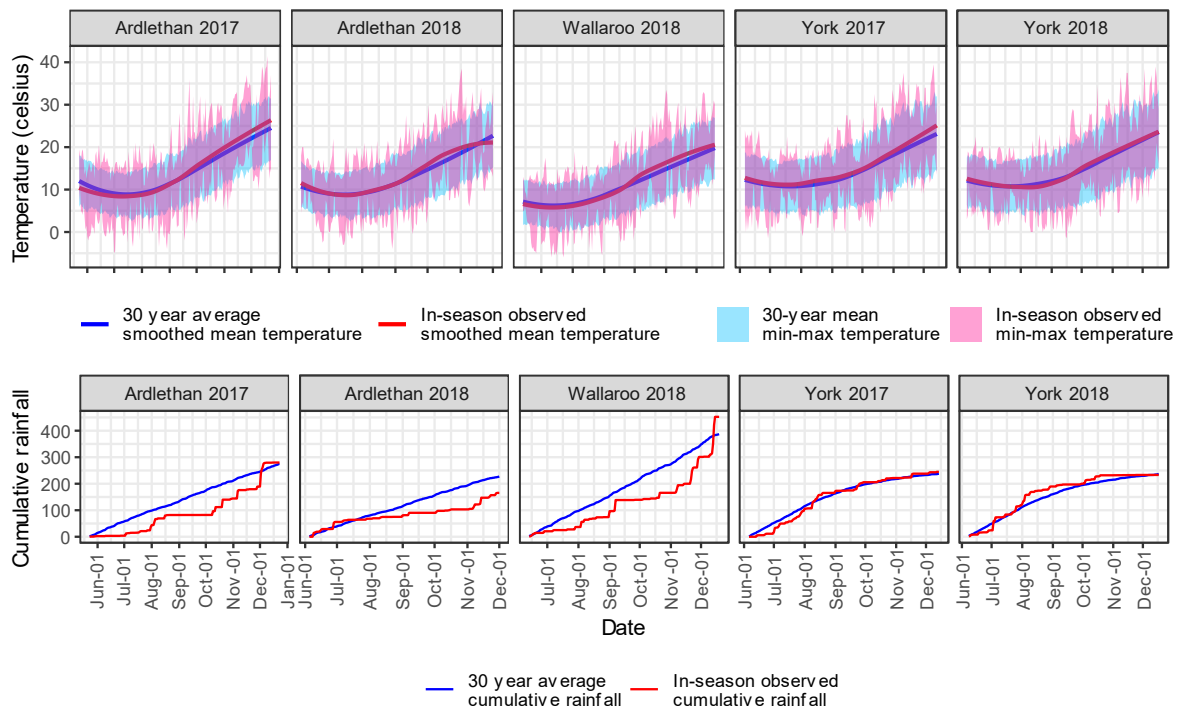

166 *Figure 1. In-season weather relative to the climatic average. The top row shows the temperature and the bottom*  
 167 *row shows the cumulative rainfall. The 30-year average (to 2017) is shown in blue, and the in-season*  
 168 *observations are shown in pink. For temperature, the ribbon is the average daily maximum and minimum*  
 169 *temperature, with the line the daily average with a loess smoother.*

170 Temperature and rainfall are summarised in Figure 1. Higher than average temperatures were  
 171 experienced during grain filling for all trials except York 2018. A colder than average start was  
 172 experienced at Ardlethan in 2017. The Ardlethan and Wallaroo trials experienced much lower than  
 173 average in-season rainfall (rain events at the end of the season in Ardlethan 2017 and Wallaroo coming  
 174 too late to contribute to productivity) whereas York experienced average rainfall.

## 175 Phenotyping

176 Biomass was measured using a terrestrial LIDAR phenotyping system, the Phenomobile-Lite, using a  
 177 3D voxel index methodology (Jimenez-Berni *et al.*, 2018). Four inner rows were sampled by quadrat  
 178 from a subset of plots (between 44 and 84 plots were sampled per trial). Quadrat sizes varied from  
 179 0.21 to 0.66 m<sup>2</sup>. A model of 301 quadrat cut biomass measurements (n=44–84 in each trial) and LIDAR  
 180 biomass measurements was generated with a multiple R<sup>2</sup> of 0.88; indicating that the two  
 181 measurements were comparable. However, the LIDAR measurements integrated a larger area of the  
 182 plot, were less susceptible to handling losses, and were faster to perform; factors that made LIDAR  
 183 the method of choice.

184 Yield was measured with a trial plot header.

## 185 Statistical analysis and QTL mapping

186 Analysis methodology followed that described in McDonald *et al.* (2015). First, for each productivity  
 187 measure (yield or biomass) a Multi-Environment Trial (MET) analysis of the combined data of the 5  
 188 trials was conducted using a linear mixed model formulation. The analyses accounted for the blocking  
 189 and unit structure in the design of each field trial through the inclusion of corresponding random  
 190 effects. Spatial effects such as large length scale trends or random run/range effects could also be  
 191 accounted for by including appropriate random or fixed effects, and the presence of autocorrelated

192 error structure across run/ranges could also be modelled. The impact of *Rhizoctonia* infection in the  
 193 York 2017 trial was accounted for by the addition of fixed linear trend and curvilinear spline  
 194 components, as per Verbyla *et al.* (1999).

195 Genetic effects were captured by the inclusion of a genotype by P treatment by environment term in  
 196 the model, allowing the estimation of the genetic variance-covariance matrix across the treatment-  
 197 environment combinations (as there are 5 trials and 2 P treatments, a 10 by 10 matrix) and the  
 198 associated genetic effect Best Linear Unbiased Predictors (BLUPs). Since estimation of the full  
 199 unstructured genetic variance matrix can be computationally difficult (55 parameters to be  
 200 estimated), it was instead approximated using the factor-analytic approach proposed by Smith *et al.*  
 201 (2001, see also 2005).

202 P response in each trial is defined using the conditional distribution of the true ‘with P’ genetic effect  
 203 given the ‘without P’ genetic effect for each trial. Under the normality assumption in the linear mixed  
 204 model, the mean of this distribution is a linear regression of the ‘with P’ genetic effect on the ‘without  
 205 P’ genetic effect (with zero intercept), with the regression slope parameter being the ratio of the  
 206 genetic covariance between the two treatments to the variance of the ‘without P’ treatment genetic  
 207 effect. Under this model, the residual is then the difference between the ‘with P’ genetic effect and  
 208 the regression coefficient multiplied by the ‘without P’ genetic effect. The estimated residual is found  
 209 by replacing the genetic effects by their BLUPs, and the covariance and variance in the regression  
 210 coefficient by their estimates found in fitting the linear mixed model. The estimated residual is a  
 211 measure of the P response.

212 The regression slope for ‘with P’ response represents the genetic productivity increase per unit  
 213 increase in the genetic effect under the ‘without P’ fertilization. Thus, the residual for a genotype is  
 214 the difference in the ‘with P’ genetic effect from the appropriately adjusted ‘without P’ genetic  
 215 effect. A large positive predicted residual indicates that the genotype responds strongly to added P.  
 216 The concept is illustrated in Figure 2.

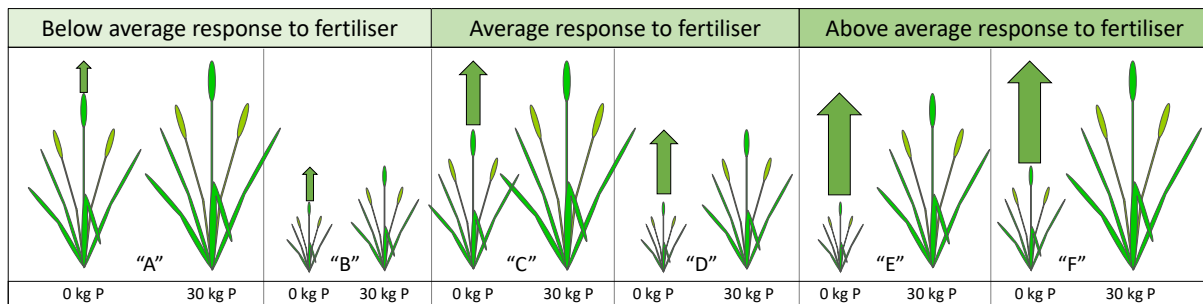

217 *Figure 2. Cartoon illustrating how genotypic “response” to P fertilisation might not relate to overall productivity. Pairs “A”*  
 218 *and “B” are less responsive, (“C” and “D” show an average response,) and “E” and “F” are highly responsive. The “resilience”*  
 219 *can be thought of as the inverse of this change: i.e. how much does the productivity of a genotype decrease from a fertilized*  
 220 *to an unfertilised state. Consequently, “A” and “B” are more resilient to the low P treatment than “E” and “F” which show low*  
 221 *resilience to the low P treatment. Note that while the magnitude of the actual change for a given genotype is the same for*  
 222 *resilience and response, how that change compares to the **population** average response or resilience (i.e. the residual upon*  
 223 *which the metric is based) will be different because it is calculated relative to different axes. The only circumstances under*  
 224 *which they would be the same is if the genetic variance of productivity at both P levels were equal.*

225 This study introduces a second criterion, “P resilience”. The well-fertilized productivity is taken to be  
 226 the norm (true in the case of conventional yield breeding for industrial agriculture) and we consider  
 227 the loss in productivity under low P conditions, relative to the population average. Resilience  
 228 represents the genetic productivity loss per unit decrease in the ‘without P’ genetic effect. In this case

229 a positive residual indicates a higher than average productivity without P fertilization, i.e. greater  
230 resilience.

231 In this paper, P resilience is defined similarly to response, by reversing the roles of the ‘with P’ and  
232 ‘without P’ treatment genetic effects. Conceptually, resilience appears to be the inverse of response,  
233 but mathematically it is not because the residual is expressed in the units of the dependent variable  
234 and will hence be different. The same covariance is used in the regression coefficient in both cases,  
235 but for response it is divided by the variance of the ‘without P’ treatment, while for resilience it is  
236 divided by the variance of the ‘with P’ treatment (Figure 2).

237 This approach can be contrasted with an alternative such as relative yield (e.g. Gong *et al.*, 2016).  
238 Relative yield is simply the yield at low P expressed as a percentage of yield at high P. However, if  
239 every genotype has the same fixed yield response to fertilization then those genotypes with a smaller  
240 absolute yield will have a larger percentage decline, or smaller relative yield, than those with higher  
241 absolute yield. This means that relative yield is strongly reflective of absolute yield.

242 Finally, each of the resulting 20 datasets (yield/biomass × resilience/response for each of five trials)  
243 were searched for QTL using the mpwgaim R package (Verbyla *et al.*, 2014).

244 The above analyses were conducted in the R (version 3.5.1) statistical computing environment (R Core  
245 Team, 2020), with the asreml package (version 3.1) for R used for all linear mixed model fits (Butler *et al.*, 2009).  
246

## 247 Results

248 Five field trials were performed at three sites with P-responsive soils over two years: Ardlethan in 2017  
249 and 2018, Wallaroo in 2018, and York in 2017 and 2018. The two measures of productivity calculated  
250 from the paired plots were anthesis biomass and grain yield. Measurements made on each plot were  
251 subject to a spatial analysis using mixed models that removed site trends from the data. The resulting  
252 measures are residuals that represent the deviation from the trial average genetic change in  
253 productivity between fertilization states of a measured genotype at a given site.

### 254 Effect of P treatment on productivity.

255 Figure 3 shows the distributions of productivity across the five trials at the two P fertilization levels.  
256 As expected, fertilisation with P increased both yield and biomass in all trials (Figure 3) indicating that  
257 P was a limiting factor and that the trials were appropriate for the assessment of PUE.

258 The in-season rainfall and temperature (Figure 1) at the sites strongly influenced productivity: York  
259 was more productive than the other sites for both biomass and yield whereas Wallaroo was slightly  
260 more productive for biomass than Ardlethan (Figure 3). The population extremes for productivity  
261 typically exceeded the range of variation of the four parental cultivars, particularly for biomass (Figure  
262 3). Among the parents cv. Yitpi typically had the greatest biomass, while cv. Westonia yielded better  
263 at York and Ardlethan in 2018 (Figure 3). Cultivars Chara and Baxter typically had the lowest biomass  
264 and Baxter was the lowest yielding of the parents (Figure 3).



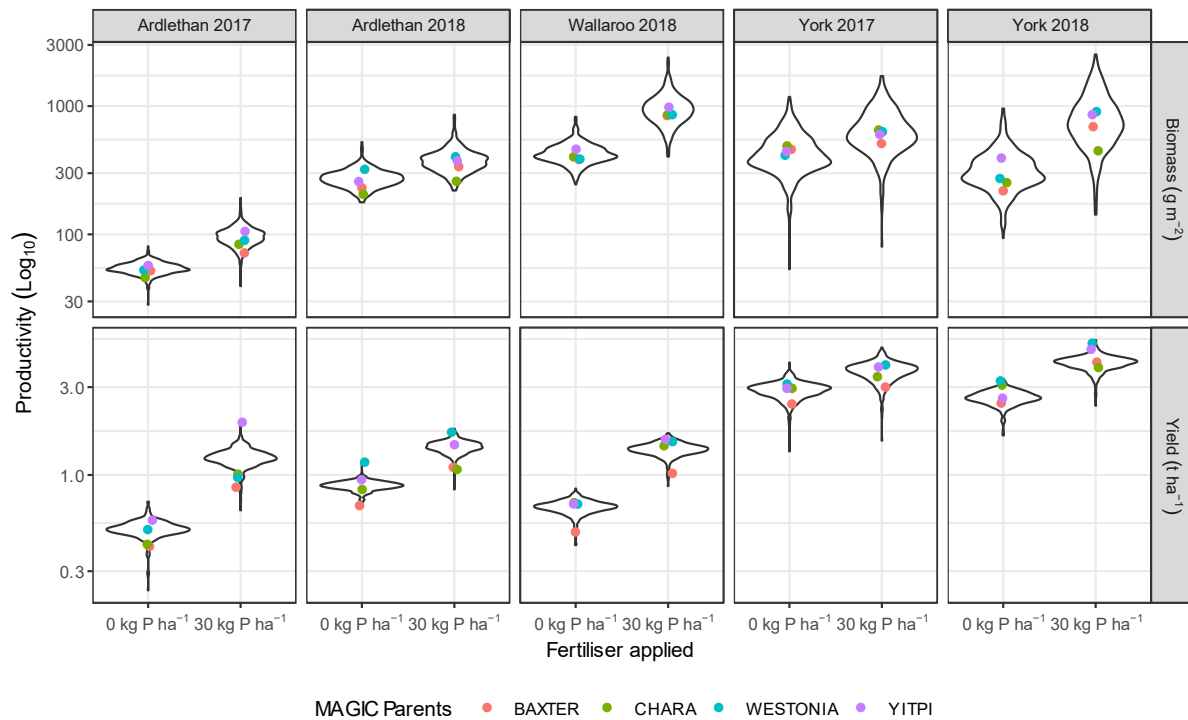

265 *Figure 3. Effect of P on productivity across trials. The plot is faceted by trial from left to right, and by the productivity measures*  
 266 *of biomass (top) and yield (bottom). Within each facet the fertilization treatment is on the x-axis and the measure of*  
 267 *productivity is shown on a Log<sub>10</sub> transformed y-axis. The spread of values across the population is shown in a “violin plot”,*  
 268 *the width of the enclosed area reflects the density of the data located there. The logarithmically scaled y-axis shows the*  
 269 *distribution within the trial, while allowing a meaningful comparison of the differences between trials. The performance of*  
 270 *the cultivar parents of the 4-way MAGIC population, as a comparison to the overall population, is shown by way of coloured*  
 271 *points. Productivity uses adjusted BLUPs, being the trial × P fertilizer applied mean plus the genetic response of the genotype.*  
 272 *Furthermore, the biomass has been converted from LIDAR index to g m<sup>-2</sup> using the modelled relationship (see Methods).*

### 273 Productivity, Response and Resilience across environments

274 PUE was assessed from the biomass and yield measurements in two ways: as “response” to  
 275 fertilization, and “resilience” to the absence of fertilization. Consequently, the four traits measured  
 276 were biomass resilience, biomass response, yield resilience and yield response. The spatial trends in  
 277 the underlying productivity data across the five trials were modelled with two separate multisite  
 278 mixed models for yield and biomass, leaving the genetic trends and unexplained variation (error).

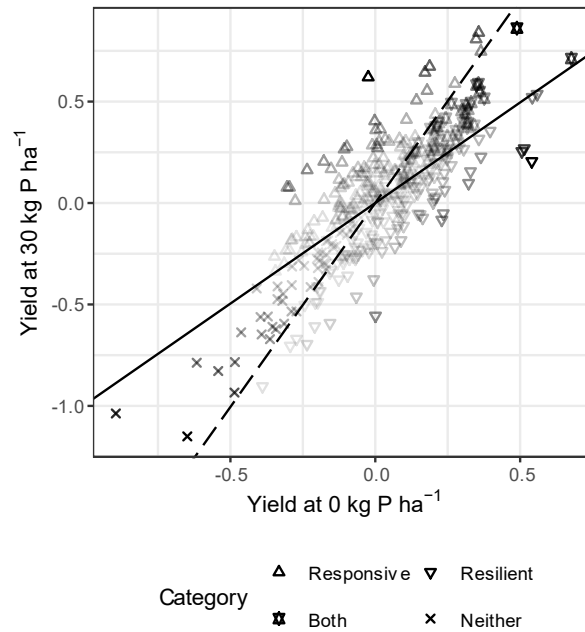

279 *Figure 4. Scatterplot of the genetic component of yield (BLUP) for each genotype at York in 2018. Yield at 30 kg P ha<sup>-1</sup> is*  
280 *plotted against yield at 0 kg P ha<sup>-1</sup>. Lines for the average genetic yield response to fertilisation (solid) and average genetic*  
281 *yield resilience in the absence of fertilization (dashed) in this trial. The difference in response for each genotype from the*  
282 *population average is its vertical distance (y-axis) from the average, i.e. the solid line. The difference in resilience for each*  
283 *genotype from the population average is its horizontal distance (x-axis) from the average, i.e. the dashed line. Each genotype*  
284 *has been categorised and coded by shape. If it is responsive, i.e. above the solid line, it is a triangle; if it is resilient, i.e. right*  
285 *of the dashed line, it is an inverted triangle; if it is both resilient and responsive, i.e. above the solid line and right of the*  
286 *dashed line, it is a star; and if it is neither resilient nor responsive, i.e. below the solid line and left of the dashed line, it is a*  
287 *cross. The shading of the point indicates the degree of response and/or resilience, and highlights that the measure is*  
288 *independent of yield at either P level. For the genotypes that are neither or both responsive and resilient the shading is the*  
289 *average of the two measures and will increase with distance from the origin. The slope of the regression is derived from a*  
290 *factor analytic model fitted across all five trials in the study and represents the genetic component of the response; it does*  
291 *not reflect a regression of the BLUPs for the two P fertilization levels.*

292 There was a strong linear relationship between productivity with and without fertilisation (Figure 4,  
293 Supplementary Figure 1). The meaning of P response and resilience, conceptually introduced in Figure  
294 2, is illustrated in Figure 4 using the genotype BLUPs for yield at York in 2018. The 30 kg P ha<sup>-1</sup> BLUPs  
295 are plotted against those at 0 kg P ha<sup>-1</sup>. The BLUPs represent the genetic component of the variation  
296 in yield in that trial and fertilization level expressed relative to the population average yield; hence  
297 they can be positive or negative. While there is a clear relationship between productivity with the two  
298 fertilizer treatments across the whole population (Supplementary Figure 1), of interest are those  
299 genotypes that deviate from the relationship; hence those with large residuals, positive and negative,  
300 in the regression.

301 It is important to note that the two regression slopes for response and resilience in Figure 4 are based  
302 on the genetic component of yield across all five trials and would differ from a linear regression  
303 performed on the BLUPs for any single trial. For response, the genotypes with a large positive residual  
304 had an above average response to fertilization with P and those with a large negative residual had a  
305 below average response to fertilization with P. Note that these residuals do not reflect absolute yield.  
306 The genotypes shaded in Figure 4 as having the highest response to P fertilization are not necessarily  
307 the genotypes with the highest yield with P; similarly those shaded with the highest resilience are not  
308 those with the highest yield without P. P-resilience is calculated from the inverse relationship; i.e.  
309 productivity at 0 kg P ha<sup>-1</sup> when regressed against 30 kg P ha<sup>-1</sup> and similar calculations can be made to  
310 identify the genotypes showing better and worse resilience compared to the population

311 (Supplementary Figure 1b). Biomass and yield were positively correlated for both response and  
312 resilience as discussed below.

313 It is also important to note that the difference in regression slopes between response and resilience  
314 (Figure 4) creates “wedges” where a genotype could be both, or neither, responsive and resilient, but  
315 that these genotypes will be strongly correlated with performance at both P levels.

316

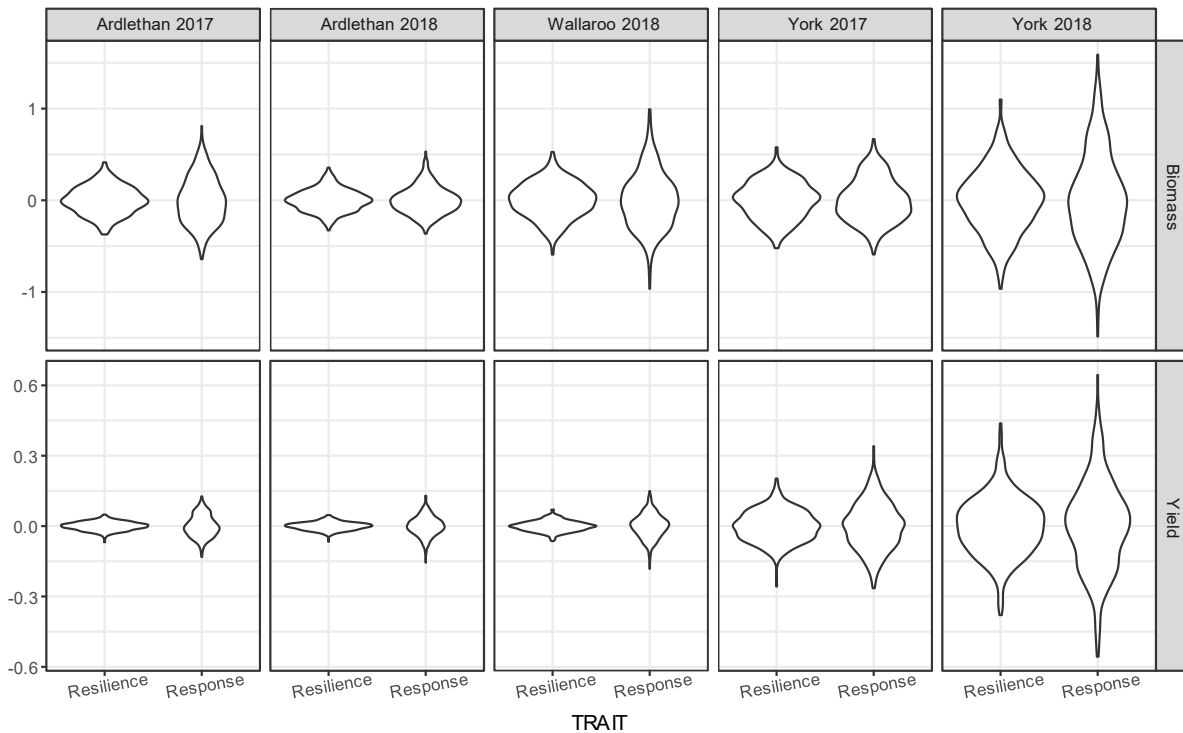

317 *Figure 5. Genotypic variation in PUE across trials. The plot is faceted by trial from left to right, and by productivity (biomass*  
318 *and yield) from top to bottom. Within each facet the PUE trait is on the x-axis and the trait value is shown on the y-axis. Note*  
319 *the variable y-axis is scaled to the extent of variation expressed in each trait.*

320 The calculated PUE values across trials for response and resilience are shown in Figure 5. A wider range  
321 of distributions were found for response compared to resilience. This reflects the axes on which the  
322 trait is expressed: response is expressed on the axis of “productivity at 30 kg P ha<sup>-1</sup>”, which is larger  
323 and has more variation than the axis of “productivity at 0 kg P ha<sup>-1</sup>” on which resilience is expressed.  
324 Similarly, the variation in yield and biomass were greatest at York which had the greatest productivity  
325 over both years.

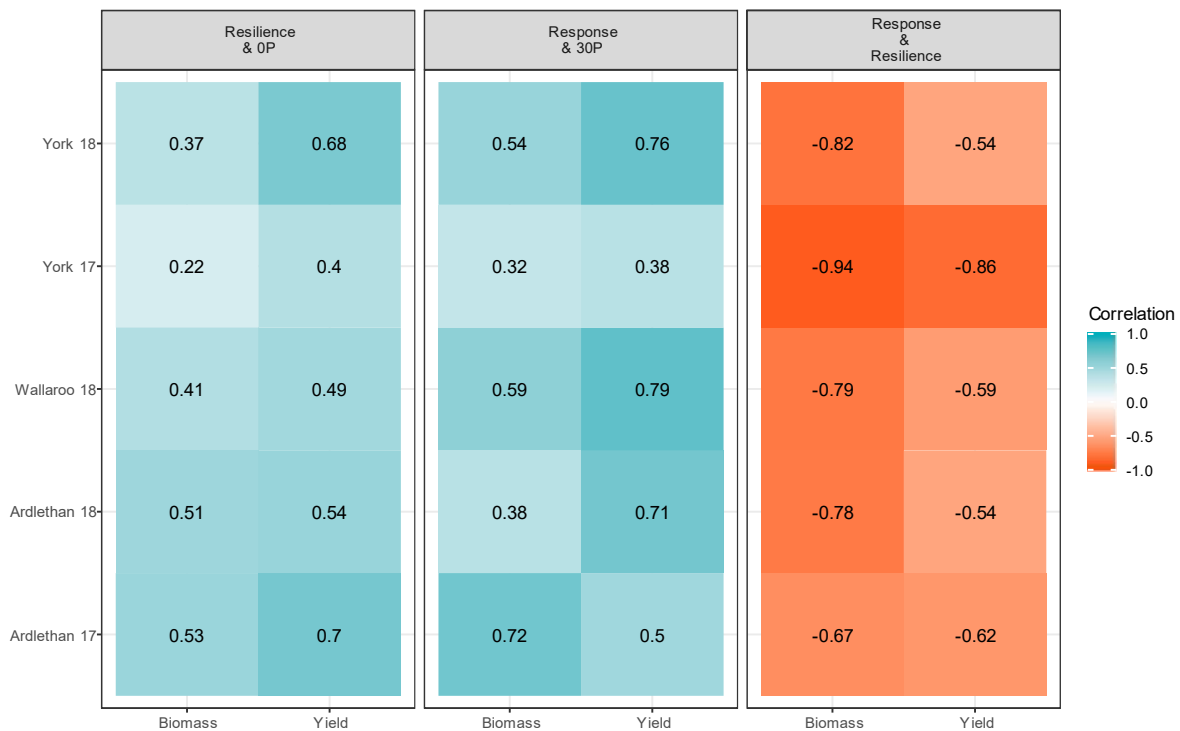

326 *Figure 6. A heatmap of selected correlations between measures. The plot is faceted by the relationship tested: Resilience and*  
 327 *Productivity at 0 kg P ha<sup>-1</sup>, Response and Productivity at 30 kg P ha<sup>-1</sup>, and Response and Resilience. Within each facet, the*  
 328 *productivity measured is on the x-axis, and the trial is on the y-axis. Each tile is coloured and labelled by the size and direction*  
 329 *of the correlation (Pearson correlation coefficient).*

330 As noted earlier, response and resilience are distinct from productivity with and without fertilization,  
 331 respectively, but they were inversely correlated as shown in Figure 6 (a full correlogram appears in  
 332 Supplementary Figure 2). The strength of the correlations varied with sites and years, but the  
 333 relationships were generally stronger for biomass than for yield. The strongest correlations occurred  
 334 at York in 2017 for both biomass (-0.94) and yield (-0.86) but reduced the following year to -0.82  
 335 and -0.54, respectively.

336 Resilience is correlated with productivity without fertilization. This relationship was strongest for yield  
 337 at York in 2018 and Ardlethan in 2017 and weakest at York in 2017. Resilience was only weakly  
 338 correlated with productivity with fertilization (Supplementary Figure 2).

339 A similar relationship emerged between response and productivity with fertilization. There was a  
 340 strong correlation between response and yield at Wallaroo in 2018 and weaker correlations at York  
 341 and Ardlethan in 2017.

342 However, there were moderate, negative relationships between biomass resilience and yield response  
 343 and yield resilience and biomass response in the two York trials and Ardlethan in 2018 (-0.27 to -0.48),  
 344 but, with the exception of York in 2018, it was not based in an equivalent negative correlation in  
 345 biomass and yield at either fertilization level.

346 *Table 2. Heritabilities of PUE traits across trials.*

| <b>Trial</b>          | <b>Biomass Response</b> | <b>Biomass Resilience</b> | <b>Yield Response</b> | <b>Yield Resilience</b> |
|-----------------------|-------------------------|---------------------------|-----------------------|-------------------------|
| <b>Ardlethan 2017</b> | 0.36                    | 0.36                      | 0.27                  | 0.27                    |
| <b>Ardlethan 2018</b> | 0.18                    | 0.18                      | 0.33                  | 0.33                    |
| <b>Wallaroo 2018</b>  | 0.25                    | 0.25                      | 0.41                  | 0.41                    |
| <b>York 2017</b>      | 0.06                    | 0.06                      | 0.11                  | 0.11                    |
| <b>York 2018</b>      | 0.17                    | 0.17                      | 0.5                   | 0.5                     |

347 The heritability of the PUE traits ranged from 0.06 to 0.50 with a mean of 0.26 (Table 2). The lowest  
 348 heritabilities for yield were obtained for the trials at York in 2017, and the highest for the trials at York  
 349 in 2018. In 2017 York experienced an early season rainfall deficit, and the trial was affected by a  
 350 *Rhizoctonia* outbreak. Damage was assessed on individual plots and although accounted for in the  
 351 spatial modelling, it is possible that this reduced the heritability of the PUE traits. The difference in  
 352 heritability between resilience and response was less than 0.001 and was rounded out (Table 2). Over  
 353 all trials, yield was more heritable than biomass (0.32 vs. 0.20).

### 354 QTL discovery

355 Twenty univariate models were generated for the five trials and four traits and the resulting QTL were  
 356 mapped with MPWGAIM. A total of 130 QTL were identified (Table 3, Supplementary Table 1). QTL  
 357 were detected on all chromosomes (Figure 7). The most QTL identified for a single trait in a single trial  
 358 was 14 QTL for biomass response at Ardlethan in 2017. No QTL were detected for yield resilience at  
 359 Ardlethan in 2018. For the remaining trials the total variance of each trait explained by the QTL ranged  
 360 from 12.8% (yield response, Ardlethan and York 2018) to 42% (biomass response, Ardlethan 2018)  
 361 with an overall average of 25.6% (Table 3).

362 *Table 3. QTL detected and total variance explained by them (in brackets) for each trial and trait combination.*

| <b>Trial</b>          | <b>Biomass resilience</b> | <b>Biomass response</b> | <b>Yield resilience</b> | <b>Yield response</b> |
|-----------------------|---------------------------|-------------------------|-------------------------|-----------------------|
| <b>Ardlethan 2017</b> | 5 (23.1%)                 | 14 (42%)                | 7 (33.7%)               | 7 (20.1%)             |
| <b>Ardlethan 2018</b> | 9 (27.8%)                 | 9 (32.1%)               | 0 (0%)                  | 2 (12.8%)             |
| <b>Wallaroo 2018</b>  | 7 (26.9%)                 | 11 (36.7%)              | 4 (15.2%)               | 11 (40.2%)            |
| <b>York 2017</b>      | 7 (27.8%)                 | 7 (27.2%)               | 4 (16%)                 | 4 (17.9%)             |
| <b>York 2018</b>      | 9 (31.3%)                 | 6 (26.6%)               | 5 (16.5%)               | 2 (12.8%)             |

363 For breeding programs, the most useful genes are those that positively influence more than one trait  
 364 over different trials. Furthermore, the most desirable PUE ideotype (Donald, 1968) would efficiently  
 365 exploit P fertilizer when it was present and soil P when it was not; i.e. it would be both responsive and  
 366 resilient. However, given the inverse correlation between response and resilience, we were concerned  
 367 to identify those QTL associated with antagonistic pleiotropy. We considered instances where there  
 368 were examples of pleiotropy associated with our QTL; i.e. where a QTL for a response at a trial has a  
 369 collocated (in the same cluster) QTL for resilience. We only considered pleiotropy within the same  
 370 productivity measure (i.e. biomass or yield) and trial to limit complexity. Where these pleiotropic QTL  
 371 have founder effects that mirror each other, we can assume it represents a gene driving a mechanism  
 372 that is antagonistic between response and resilience.

373 Therefore, we further grouped the 130 QTL into 56 clusters that were within 10 cM of each other on  
374 the genetic map as shown in Figure 7. The multiparent WGAIM methodology gives effect sizes for each  
375 of the four founders of the population, cv. Yitpi, Baxter, Chara, and Westonia, shown in Figure 8. Of  
376 the 56 QTL clusters 27 (48%) only contain a single QTL, and a further 12 (21%) contain only two. The  
377 largest cluster contains eight QTL.

378 The 4-way MAGIC population used in this study has previously been scored for other traits including  
379 root hair length, seedling growth, and traits related to canopy architecture and dormancy (see  
380 introduction). Root hair length is of demonstrated value to PUE in both glasshouse and field studies  
381 (Gahoonia and Nielsen, 1997, 2003). Delhaize *et al.* (2015) scored two wheat MAGIC populations,  
382 including the 4-way population used in this study, for root hair length using rhizosheath size as a  
383 surrogate assay. They identified 18 loci linked with this trait. Six of the major QTL mapped to  
384 chromosomes 2B, 4D, 5A, 5B, 6A, and 7A and explained between 4.5 and 9.7% of the variation each  
385 (Delhaize *et al.*, 2015). The QTL identified for root hair length were compared with the QTL in this  
386 study. They were clustered in the manner described above and are shown in Figure 7. Five of these  
387 six major root hair length loci clustered with PUE QTL (the loci on 5B was the exception). Three other  
388 weaker QTL identified in the Delhaize *et al.* study (there were 18 in total) were also clustered with PUE  
389 QTL (Figure 7).

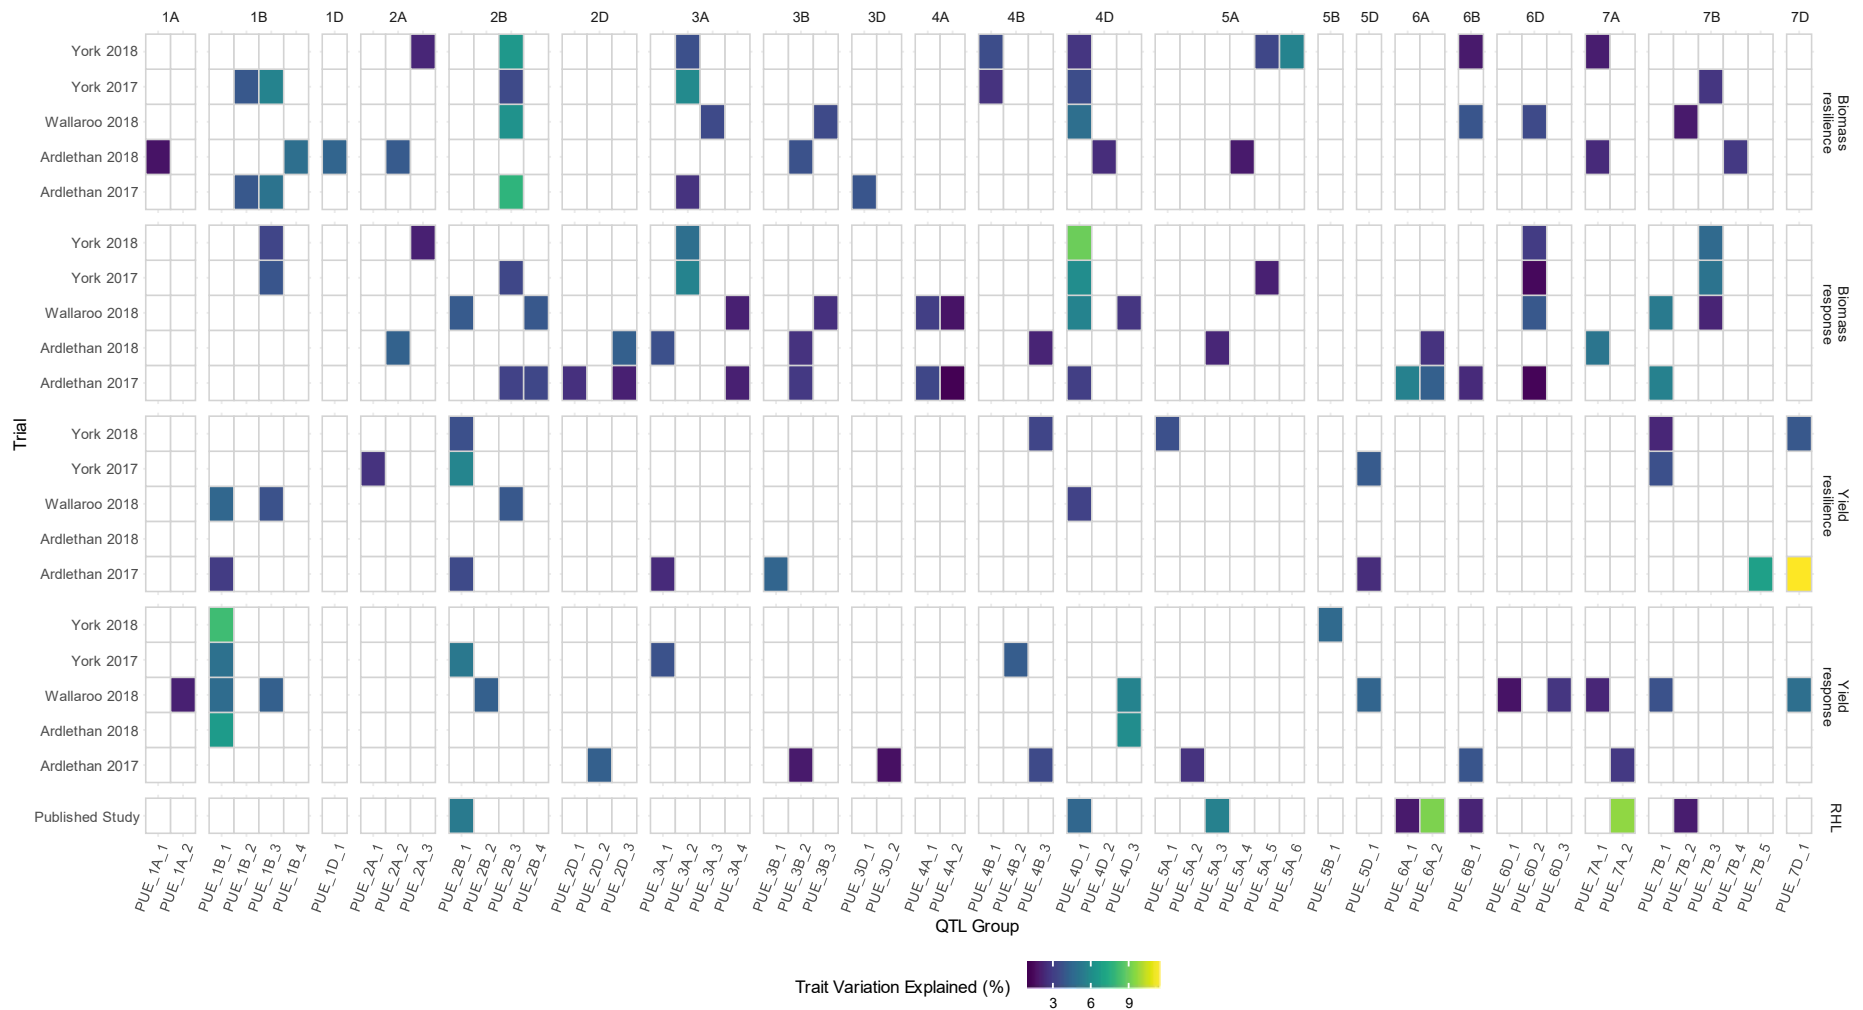

390 Figure 7. Location (chromosome), occurrence (trial and trait) and strength (variation explained) of the 130 QTL identified for four PUE traits across five trials. The QTL were allocated to 56 groups  
 391 each designated with a "PUE\_" prefix, then grouped and numbered by chromosome. The plot is faceted by chromosome from left to right, and trait from top to bottom. Within each facet the  
 392 QTL group is on the x-axis and the trial is on the y-axis. The percentage of the genetic variation for the trait explained by the QTL is shown by the colour of the tile. The bottom facet is also a trait,  
 393 root hair length, from the published data of Delhaize et al. (2015), also from the 4-Way MAGIC population for the purposes of showing co-location.

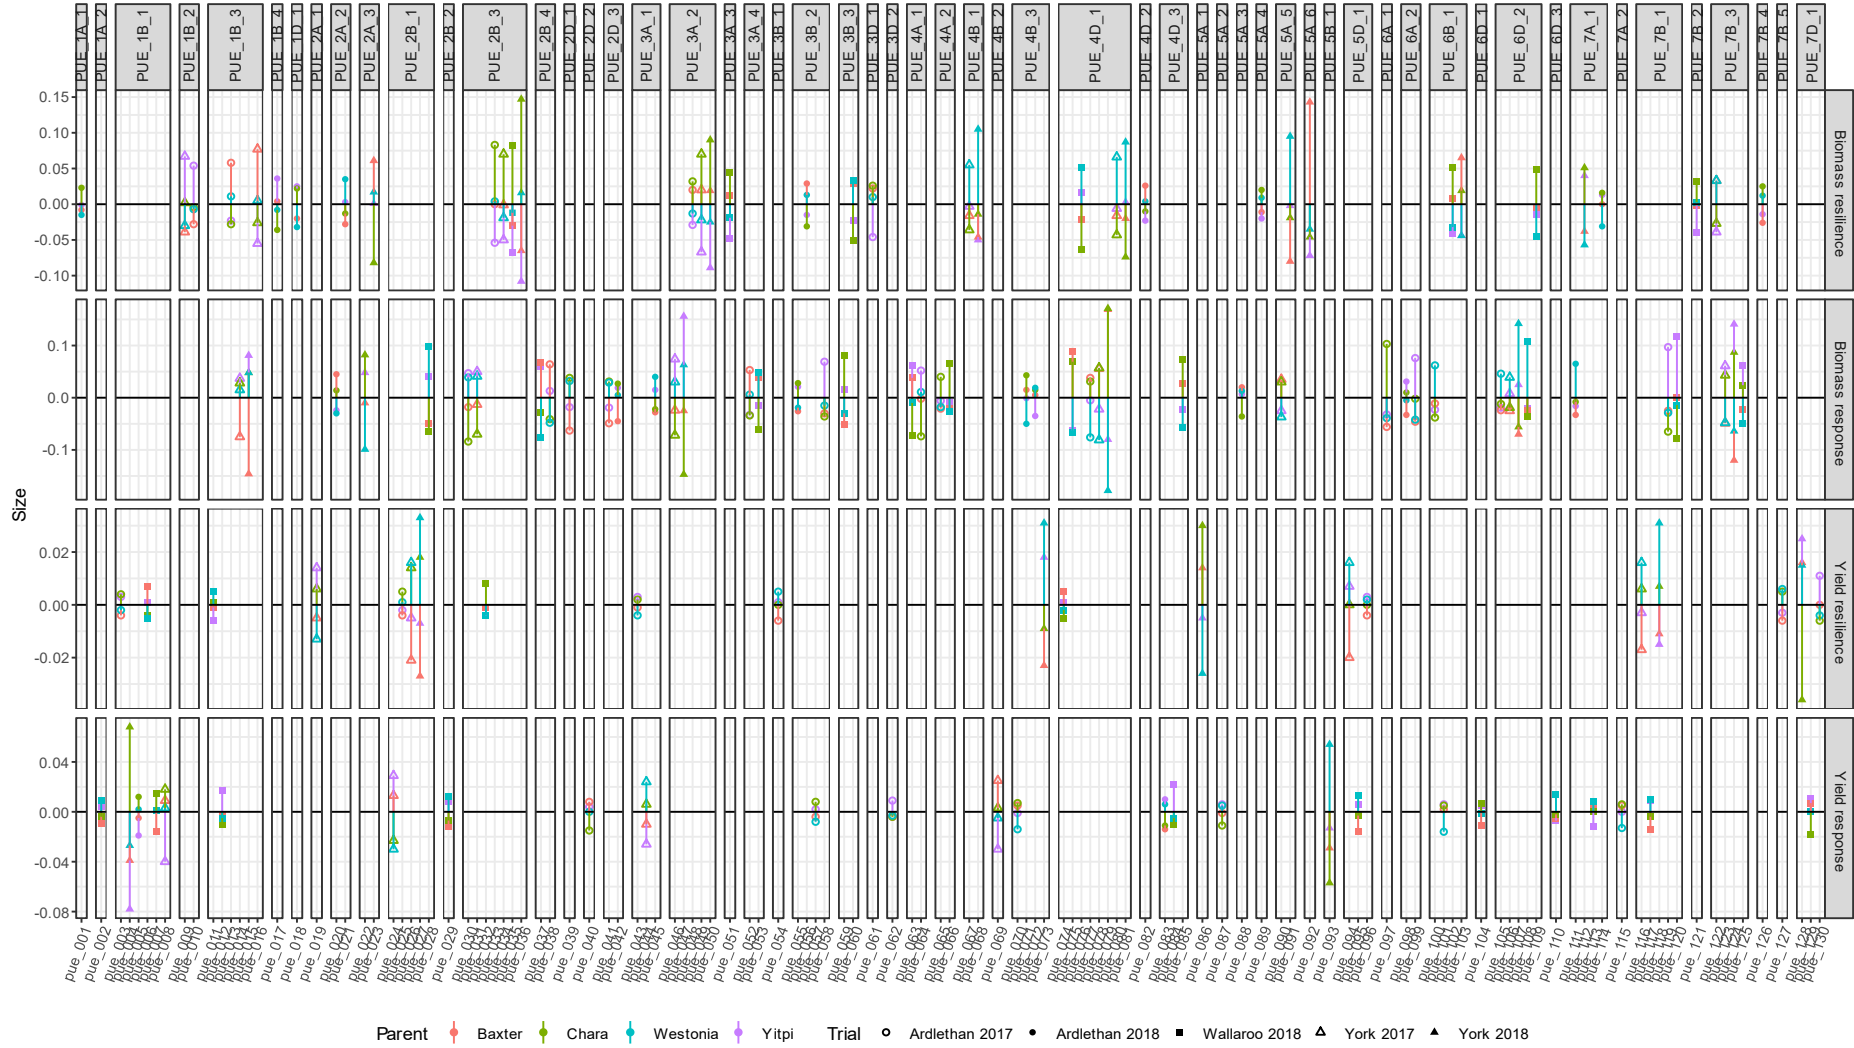

394 Figure 8. Founder (allele) effects for each of the 130 QTL identified for four PUE traits across five trials in 56 groups each designated with a “PUE\_” prefix, then clustered and numbered by  
 395 chromosome. The plot is faceted by QTL cluster from left to right, and trait from top to bottom. Within each facet the QTL is on the x-axis and the effect size is on the y-axis. The effect size of the  
 396 allele is on the scale of the trait (i.e. the marginal change in biomass index or yield in  $t\ ha^{-1}$ ).



397 We assume the clusters represent a single gene, and that where the cluster contains multiple QTL it is  
 398 a single gene influencing multiple traits in multiple environments. Therefore, a cluster would not  
 399 include more than one QTL for the same trial × trait combination. However, *PUE\_4B\_3* has two  
 400 proximate QTL (*pue\_071* and *pue\_072*, Figure 8) for the same trait and trial, biomass response at  
 401 Ardlethan 2018, that have founder effects that are different suggesting that there may be two genes  
 402 in proximity. QTL *pue\_072* was excluded from subsequent analyses of allele effects as it had smaller  
 403 effect sizes. Note that the assumption that the clusters represent a single gene can only be confirmed  
 404 by subsequent sequencing and/or cloning, which is beyond the scope of this study.

405 The founder effect sizes were used to classify the founder alleles effect as “positive”, “negative”, or  
 406 “neutral” (the range between the maximum, positive, value and the minimum, negative, value was  
 407 split into thirds – the middle third being “neutral”). The four traits were then considered in terms of  
 408 the “productivity” measured, i.e. yield or biomass, and the trait measured, response or resilience.  
 409 Within the 56 QTL clusters, if there were pleiotropic QTL where the positive founder for response  
 410 was also a negative founder for resilience then it was considered to be “antagonistic”. Thirteen of  
 411 the 56 QTL clusters had an example of pleiotropy of which three clusters had two examples and one  
 412 had three examples for a total of 18 examples; three for yield and 15 for biomass. All 18 examples  
 413 had an allele that was antagonistic (i.e. positive for response but negative for resilience). However,  
 414 because there are four parents to the population there were alternative alleles, and hence 15 of the  
 415 18 pleiotropic QTL had alleles that were not antagonistic, including two of the three examples of  
 416 yield. Note that this approach uses arbitrary assumptions and a very limited definition of  
 417 “antagonism” and “pleiotropism” to illustrate the extent to which the collection of QTL and clusters  
 418 is independent with respect to response and resilience.

419 The effect of combinations of alleles on the four traits in the different trials can be calculated,  
 420 although the selection of those combinations for the purposes of breeding requires value  
 421 judgements beyond the scope of this paper (see discussion). For example, the predicted change in  
 422 trait and trial values for the 6 alleles associated with the greatest root hair length in Delhaize *et al.*  
 423 (2015) is shown in Figure 9. The change is measured in terms of the percent of the variation  
 424 attributable to genetics (to normalise for biomass and yield being on different scales: i.e. “lidar  
 425 index” vs.  $t\ ha^{-1}$ ). If the effect is due to longer root hairs, then the impact is mixed. For example, it is  
 426 positive for yield resilience at York in both years and, to a lesser extent, Ardlethan in 2017, and it is  
 427 also positive for yield response in Ardlethan in 2017. It was negative for response at York 2017, but  
 428 not 2018, and a negative for yield resilience in Wallaroo.

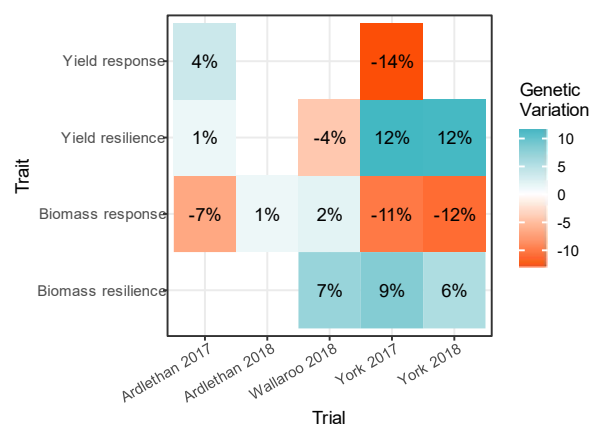

429 *Figure 9. The calculated effect on the variation for traits and trials of the alleles conferring the greatest root hair length in*  
 430 *Delhaize et al. (2015). The variation is calculated as the percentage of the trait variation that could be attributed to QTL*  
 431 *effects.*

## 432 Discussion

### 433 Response and Resilience

434 This study took an agnostic approach to the mechanisms driving an improvement in PUE. PUE is an  
435 aggregate of traits, and from a practical perspective it is not essential to understand what traits  
436 underly the QTL. However, by comparing productivity with 0 and 30 kg P ha<sup>-1</sup> fertilization the response  
437 and resilience traits are likely to be associated with distinct physiological mechanisms. For instance,  
438 plants that forage the topsoil will be more resilient in soils with low levels of available Pi, whereas  
439 plants able to better exploit narrow bands of concentrated P are likely to be the more responsive in  
440 fertilized soils.

441 Response and resilience traits might be antagonistic, particularly from a “rhizoeconomic” perspective  
442 (see Lynch *et al.*, 2005). An expansive foraging root system may be advantageous under severe  
443 deficiency but, where P is abundant, the same trait might represent an unnecessarily high cost to the  
444 plant, potentially reducing productivity. The negative correlation of response and resilience in this  
445 study is evidence of antagonistic effects of some traits on these two different aspects of PUE; though  
446 the trait agnostic approach used does not give insight into which traits are antagonistic. However,  
447 there were relatively few examples of antagonistic QTL in this study and they were largely associated  
448 with biomass (15 examples) rather than yield (three examples).

449 One example of antagonistic QTL is associated with root hair length. The cv. Westonia allele associated  
450 with cluster PUE\_2B\_1 was positive for yield resilience at York in 2018 (pue\_027) and 2017 (pue\_026),  
451 but was negative for yield response in 2017 (pue\_024, Figure 8). The same allele was also a major  
452 positive influence on root hair length in Delhaize *et al.* (2015). This suggests that root hair length had  
453 a positive effect on P uptake particularly when foraging, but it is less clear why it would have had a  
454 negative impact on yield response and only in 2017. It should be noted that while the effect of  
455 *Rhizoctonia* at York in 2017 was scored and accounted for in its effects on yield and biomass if there  
456 were any effects that were not associated with the barepatch symptoms they may not have been  
457 accounted for. One could speculate that there might be a relationship between root hair length and  
458 disease. For example, root hairs are the site of infection for *Pythium* root rot species in wheat (Bruehl,  
459 1953; Royle and Hickman, 1964), although there are no studies examining root hair length and  
460 infection density. Furthermore, these alleles had a positive impact on response at Ardlethan in 2017,  
461 where there was a substantial deficit in early rainfall and indeed any rainfall. The hairs may have  
462 helped take up fertilizer in dry top-soil conditions.

### 463 Achieving the economic optimum.

464 The goal of breeding for enhanced PUE is not to abolish the application of P fertilizers, but rather to  
465 reduce the rate of Pi application. Bovill *et al.* (2013) advocate the economic optimum as a goal of PUE  
466 breeding: assessing the point at which the marginal cost of applying additional fertilizer meets the  
467 marginal increase in profit. As the cost of P fertilizer increases, the economic optimum decreases and  
468 therefore the goal of PUE breeding should be to both improve the response to the application of P  
469 and improve the ability of the crop to exploit residual soil P. Australian farmers typically band P  
470 fertilizers at sowing, a response to the generally P deficient soils. While high fertilizer prices and  
471 drought conditions are seeing this practice reduced, it is still likely that fertilizer will be applied to  
472 compensate for P removed by the previous year’s crop and at rates that reflect the poor efficiency of  
473 uptake. The idiosyncratic genotype would combine both response and resilience traits; efficiently utilizing  
474 a reduced rate of fertilization.

475 The response of productivity to increasing P fertilization is not linear but a saturating curve. Finding  
476 the point of inflection is challenging (Simpson *et al.*, 2014, 2015; Haling *et al.*, 2016), requiring multiple

477 rates of P application. QTL mapping requires large populations to be meaningful, so treatment  
478 numbers must be minimized for trials to be practical. A follow up study could select optimised  
479 combinations of response and resilience QTL alleles for particular environments (avoiding and/or  
480 compensating for antagonistic effects). Smaller subsets of genotypes in the MAGIC population with  
481 these desirable combinations (“tails” similar to the phenotypic approach proposed by Rebetzke *et al.*  
482 (2017)) could be assembled and grown at a wider range of intermediate P rates to confirm whether  
483 these QTL can be combined to reduce the economic optimum rate of P while maintaining productivity.

#### 484 [Improving PUE through breeding.](#)

485 Bovill *et al.* (2013) concluded that the lack of a consistent definition of PUE is hampering the genetic  
486 improvement of the trait. The response approach of McDonald *et al.* (2015), employed in this study  
487 and extended with the concept of resilience, aims to separate the measurement of PUE from absolute  
488 productivity.

489 Nevertheless, response and resilience were positively correlated with productivity with and without  
490 fertilizer, respectively. This suggests that response is increasing passively through yield breeding  
491 where non-limiting P is provided (as is typically the case). Passive gains in fertilizer use efficiency  
492 through yield breeding have been demonstrated (Batten, 1992; Ortiz-Monasterio R. *et al.*, 1997). The  
493 correlation between 0 kg P ha<sup>-1</sup> productivity and resilience suggests a breeder with interest in  
494 resilience traits could breed for productivity in the absence of P fertilizer. However, it is worth noting  
495 that performance in low-input conditions will not necessarily be undermined by breeding and  
496 selection in high-input conditions (Voss-Fels *et al.*, 2019)

497 However, as the range of correlations shows, there is also scope for breeding directly for PUE traits.  
498 Given (a) the pipeline for the development and release of a new wheat variety can be 5-10 years and  
499 (b) long term fertilizer price increases can be predicted with some certainty it may be profitable to  
500 breed specifically for improved PUE. A QTL study, like this one, also allows for the development of  
501 marker assisted selection approaches within breeding programs. Breeders are adopting genomic  
502 selection strategies, as sequencing and mapping costs drop. PUE QTL can help to define the breeding  
503 values for a marker matrix, developing a variety optimized not for current fertilizer prices, but the  
504 prices expected 10 years hence when the variety comes to market. Trait relevant markers have been  
505 shown to increase prediction accuracy when paired with genomic selection in maize (Liu *et al.*, 2019).

#### 506 [Future directions and conclusion](#)

507 Improving crop PUE is an intrinsically valuable goal considering the increasing cost and importance of  
508 P as agricultural input. However, a breeding program focused on PUE will have to compete with other  
509 priorities such as disease resistance and adaptation to climate change. The identification of QTL allows  
510 the development of trait relevant markers that can be integrated into marker assisted selection or  
511 genomic selection approaches. Trialling “tail” combinations of these QTL at a wider range of  
512 fertilization rates could help to establish the effect on the economic optimum P fertilization rate.

#### 513 [Authors’ Contributions](#)

514 PRR and ED conceived of the study. The experiments were designed and executed by APW, GP, and  
515 CW. The layouts were designed by ABZ and APW. The data was analysed by ABZ, APV, and APW. APW  
516 wrote the manuscript with input from ABZ, APV, PRR and ED.

#### 517 [Acknowledgements](#)

518 We are profoundly grateful to farmers Grant Kitto and Charlie Boyle for hosting our trials. We thank  
519 John Byrne, Tom McLucas, Savannah McGuirk, and Geetha Perera for their dedicated efforts in

520 maintaining, sampling, and processing the experiments. We thank Jamie Scarrow and Michael Salim  
521 of the Australian Plant Phenomics Facility for excellent support with the Phenomobile Lite. This work  
522 was supported by a Grains Research and Development Corporation grant CFF00009 *Molecular*  
523 *markers for root hair traits and enhanced phosphorus use efficiency (PUE) in wheat.*

## 524 References

- 525 **Australian Bureau of Statistics.** 2018. Land management and farming in Australia, state and territory  
526 and NRM - 2016-17.
- 527 **Barrero JM, Cavanagh C, Verbyla KL, et al.** 2015. Transcriptomic analysis of wheat near-isogenic lines  
528 identifies PM19-A1 and A2 as candidates for a major dormancy QTL. *Genome Biology* **16**, 93.
- 529 **Batten GD.** 1992. A review of phosphorus efficiency in wheat. *Plant Soil* **146**, 163–168.
- 530 **Bialeski RL.** 1973. Phosphate Pools, Phosphate Transport, and Phosphate Availability. *Annual Review*  
531 *of Plant Physiology* **24**, 225–252.
- 532 **Boden SA, Cavanagh C, Cullis BR, Ramm K, Greenwood J, Jean Finnegan E, Trevaskis B, Swain SM.**  
533 2015. Ppd-1 is a key regulator of inflorescence architecture and paired spikelet development in wheat.  
534 *Nature Plants* **1**, 1–6.
- 535 **Bovill WD, Huang CY, McDonald GK.** 2013. Genetic approaches to enhancing phosphorus-use  
536 efficiency (PUE) in crops: challenges and directions. *Crop Pasture Sci.* **64**, 179–198.
- 537 **Bruehl GW.** 1953. *Pythium root rot of barley and wheat*. U.S. Dept. of Agriculture.
- 538 **Butler D, Cullis B, Gilmour A, Gogel B.** 2009. *asreml: asreml () fits the linear mixed model. R package*  
539 *version 3.0*. VSNi.
- 540 **Cavanagh CR, Chao S, Wang S, et al.** 2013. Genome-wide comparative diversity uncovers multiple  
541 targets of selection for improvement in hexaploid wheat landraces and cultivars. *Proc. Natl. Acad. Sci.*  
542 *U. S. A.* **110**, 8057–8062.
- 543 **Colwell JD.** 1963. The estimation of the phosphorus fertilizer requirements of wheat in southern New  
544 South Wales by soil analysis. *Australian Journal of Experimental Agriculture* **3**, 190–197.
- 545 **Delhaize E, Rathjen TM, Cavanagh CR.** 2015. The genetics of rhizosheath size in a multiparent mapping  
546 population of wheat. *J. Exp. Bot.* **66**, 4527–4536.
- 547 **Donald CM.** 1968. The breeding of crop ideotypes. *Euphytica* **17**, 385–403.
- 548 **Egle K, Manske G, Römer W, Vlek PLG.** 1999. Improved phosphorus efficiency of three new wheat  
549 genotypes from CIMMYT in comparison with an older Mexican variety. *Z. Pflanzenernähr. Bodenk.*  
550 **162**, 353–358.
- 551 **Gahoonia TS, Nielsen NE.** 1997. Variation in root hairs of barley cultivars doubled soil phosphorus  
552 uptake. *Euphytica* **98**, 177–182.
- 553 **Gahoonia TS, Nielsen NE.** 2003. Phosphorus ( P ) uptake and growth of a root hairless barley mutant  
554 ( bald root barley , brb ) and wild type in low- and high-P soils. , 1759–1766.
- 555 **Gong X, Wheeler R, Bovill WD, McDonald GK.** 2016. QTL mapping of grain yield and phosphorus  
556 efficiency in barley in a Mediterranean-like environment. *Theor. Appl. Genet.* **129**, 1657–1672.
- 557 **Guo Y, Kong F, Xu Y, Zhao Y, Liang X, Wang Y, An D, Li S.** 2012. QTL mapping for seedling traits in  
558 wheat grown under varying concentrations of N, P and K nutrients. *Theoretical and Applied Genetics*  
559 **124**, 851–865.

- 560 **Haling RE, Yang Z, Shadwell N, Culvenor RA, Stefanski A, Ryan MH, Sandral GA, Kidd DR, Lambers H,**  
561 **Simpson RJ.** 2016. Root morphological traits that determine phosphorus-acquisition efficiency and  
562 critical external phosphorus requirement in pasture species. *Functional Plant Biology* **43**, 815–826.
- 563 **Huang BE, Clifford D, Cavanagh C.** 2013. Selecting subsets of genotyped experimental populations for  
564 phenotyping to maximize genetic diversity. *Theor. Appl. Genet.* **126**, 379–88.
- 565 **Huang BE, George AW, Forrest KL, Kilian A, Hayden MJ, Morell MK, Cavanagh CR.** 2012. A multiparent  
566 advanced generation inter-cross population for genetic analysis in wheat. *Plant Biotechnol. J.* **10**, 826–  
567 839.
- 568 **Jimenez-Berni JA, Deery DM, Rozas-Larraondo P, Condon ATG, Rebetzke GJ, James RA, Bovill WD,**  
569 **Furbank RT, Sirault XRR.** 2018. High Throughput Determination of Plant Height, Ground Cover, and  
570 Above-Ground Biomass in Wheat with LiDAR. *Front. Plant Sci.* **9**, 237.
- 571 **Liu X, Wang H, Hu X, Li K, Liu Z, Wu Y, Huang C.** 2019. Improving Genomic Selection With Quantitative  
572 Trait Loci and Nonadditive Effects Revealed by Empirical Evidence in Maize. *Frontiers in Plant Science*  
573 **10**.
- 574 **Lynch JP, Ho MD, Phosphorus L.** 2005. Rhizoeconomics: Carbon costs of phosphorus acquisition. *Plant*  
575 *Soil* **269**, 45–56.
- 576 **Lyness AS.** 1936. Varietal Differences in the Phosphorus Feeding Capacity of Plants. *Plant Physiology*  
577 **11**, 665–688.
- 578 **Manske GGB, Ortiz-Monasterio JI, van Ginkel M, González RM, Fischer RA, Rajaram S, Vlek PLG.**  
579 2001. Importance of P uptake efficiency versus P utilization for wheat yield in acid and calcareous soils  
580 in Mexico. *European Journal of Agronomy* **14**, 261–274.
- 581 **McDonald G, Bovill W, Taylor J, Wheeler R.** 2015. Responses to phosphorus among wheat genotypes.  
582 *Crop Pasture Sci.* **66**, 430.
- 583 **Mclaughlin MJ, Alston AM.** 1986. The relative contribution of plant residues and fertilizer to the  
584 phosphorus nutrition of wheat in a pasture cereal system. *Soil Research* **24**, 517–526.
- 585 **Mclaughlin MJ, Alston AM, Martin JK.** 1988. Phosphorus cycling in wheat pasture rotations .I. The  
586 source of phosphorus taken up by wheat. *Soil Research* **26**, 323–331.
- 587 **Ortiz-Monasterio R. JI, Sayre KD, Rajaram S, McMahan M.** 1997. Genetic Progress in Wheat Yield and  
588 Nitrogen Use Efficiency under Four Nitrogen Rates. *Crop Science* **37**, 898–904.
- 589 **R Core Team.** 2020. *R: A Language and Environment for Statistical Computing*. Vienna, Austria.
- 590 **Rebetzke GJ, Richards RA, Holland JB.** 2017. Population extremes for assessing trait value and  
591 correlated response of genetically complex traits. *Field Crops Research* **201**, 122–132.
- 592 **Rebetzke GJ, Verbyla AP, Verbyla KL, Morell MK, Cavanagh CR.** 2014. Use of a large multiparent  
593 wheat mapping population in genomic dissection of coleoptile and seedling growth. *Plant*  
594 *Biotechnology Journal* **12**, 219–230.
- 595 **Richards RA, Cavanagh CR, Riffkin P.** 2019. Selection for erect canopy architecture can increase yield  
596 and biomass of spring wheat. *Field Crops Research* **244**, 107649.

- 597 **Rose TJ, Rose MT, Pariasca Tanaka J, Heuer S, Wissuwa M.** 2011. The Frustration with Utilization:  
598 Why Have Improvements in Internal Phosphorus Utilization Efficiency in Crops Remained so Elusive?  
599 *Frontiers in Plant Science* **2**.
- 600 **Royle DJ, Hickman CJ.** 1964. Analysis of Factors Governing in Vitro Accumulation of Zoospores of  
601 *Pythium Aphanidermatum* on Roots: I. Behavior of Zoospores. *Canadian Journal of Microbiology* **10**,  
602 151–162.
- 603 **Ruiz S, Koebernick N, Duncan S, et al.** 2020. Significance of root hairs at the field scale – modelling  
604 root water and phosphorus uptake under different field conditions. *Plant and Soil* **447**, 281–304.
- 605 **Ryan PR, Liao M, Delhaize E, Rebetzke GJ, Weligama C, Spielmeier W, James RA.** 2015. Early vigour  
606 improves phosphate uptake in wheat. *J. Exp. Bot.*, *erv403*.
- 607 **Sakano K.** 1990. Proton/Phosphate Stoichiometry in Uptake of Inorganic Phosphate by Cultured Cells  
608 of *Catharanthus roseus* (L.) G. Don. *Plant Physiology* **93**, 479–483.
- 609 **Schachtman DP, Reid RJ, Ayling SM.** 1998. Phosphorus Uptake by Plants: From Soil to Cell. *Plant*  
610 *Physiology* **116**, 447–453.
- 611 **Sharpley AN.** 1986. Disposition of Fertilizer Phosphorus Applied to Winter Wheat. *Soil Science Society*  
612 *of America Journal* **50**, 953–958.
- 613 **Sharpley AN, McDowell RW, Kleinman PJA.** 2001. Phosphorus loss from land to water: integrating  
614 agricultural and environmental management. *Plant and Soil* **237**, 287–307.
- 615 **Shen J, Yuan L, Zhang J, Li H, Bai Z, Chen X, Zhang W, Zhang F.** 2011. Phosphorus Dynamics: From Soil  
616 to Plant. *Plant Physiology* **156**, 997–1005.
- 617 **Simpson RJ, Richardson AE, Nichols SN, Crush JR.** 2014. Pasture plants and soil fertility management  
618 to improve the efficiency of phosphorus fertiliser use in temperate grassland systems. *Crop and*  
619 *Pasture Science* **65**, 556–575.
- 620 **Simpson RJ, Stefanski A, Marshall DJ, Moore AD, Richardson AE.** 2015. Management of soil  
621 phosphorus fertility determines the phosphorus budget of a temperate grazing system and is the key  
622 to improving phosphorus efficiency. *Agriculture, Ecosystems & Environment* **212**, 263–277.
- 623 **Smith A, Cullis B, Thompson R.** 2001. Analyzing Variety by Environment Data Using Multiplicative  
624 Mixed Models and Adjustments for Spatial Field Trend. *Biometrics* **57**, 1138–1147.
- 625 **Smith AB, Cullis BR, Thompson R.** 2005. The analysis of crop cultivar breeding and evaluation trials:  
626 an overview of current mixed model approaches. *J. Agric. Sci.* **143**, 449.
- 627 **Su J, Xiao Y, Li M, Liu Q, Li B, Tong Y, Jia J, Li Z.** 2006. Mapping QTLs for Phosphorus-Deficiency  
628 Tolerance at Wheat Seedling Stage. *Plant and Soil* **281**, 25–36.
- 629 **Su J-Y, Zheng Q, Li H-W, Li B, Jing R-L, Tong Y-P, Li Z-S.** 2009. Detection of QTLs for phosphorus use  
630 efficiency in relation to agronomic performance of wheat grown under phosphorus sufficient and  
631 limited conditions. *Plant Science* **176**, 824–836.
- 632 **Ulén B, Bechmann M, Fölster J, Jarvie HP, Tunney H.** 2007. Agriculture as a phosphorus source for  
633 eutrophication in the north-west European countries, Norway, Sweden, United Kingdom and Ireland:  
634 a review. *Soil Use and Management* **23**, 5–15.

- 635 **Ullrich-Eberius CI, Novacky A, van Bel AJE.** 1984. Phosphate uptake in *Lemna gibba* G1: energetics and  
636 kinetics. *Planta* **161**, 46–52.
- 637 **Vance CP, Uhde-Stone C, Allan DL.** 2003. Phosphorus acquisition and use: critical adaptations by  
638 plants for securing a nonrenewable resource. *New Phytologist* **157**, 423–447.
- 639 **Verbyla AP, Cullis BR, Kenward MG, Welham SJ.** 1999. The Analysis of Designed Experiments and  
640 Longitudinal Data by Using Smoothing Splines. *Journal of the Royal Statistical Society: Series C (Applied*  
641 *Statistics)* **48**, 269–311.
- 642 **Verbyla AP, George AW, Cavanagh CR, Verbyla KL.** 2014. Whole-genome QTL analysis for MAGIC.  
643 *Theor. Appl. Genet.* **127**, 1753–1770.
- 644 **Voss-Fels KP, Robinson H, Mudge SR, et al.** 2018. VERNALIZATION1 Modulates Root System  
645 Architecture in Wheat and Barley. *Mol. Plant* **11**, 226–229.
- 646 **Voss-Fels KP, Stahl A, Wittkop B, et al.** 2019. Breeding improves wheat productivity under contrasting  
647 agrochemical input levels. *Nature Plants* **5**, 706–714.
- 648 **Wang S, Wong D, Forrest K, et al.** 2014. Characterization of polyploid wheat genomic diversity using  
649 a high-density 90 000 single nucleotide polymorphism array. *Plant Biotechnology Journal* **12**, 787–796.
- 650 **Wissuwa M, Yano M, Ae N.** 1998. Mapping of QTLs for phosphorus-deficiency tolerance in rice (*Oryza*  
651 *sativa* L.). *Theoretical and Applied Genetics* **97**, 777–783.
- 652 **Yang M, Wang C, Hassan MA, Li F, Xia X, Shi S, Xiao Y, He Z.** 2021. QTL mapping of root traits in wheat  
653 under different phosphorus levels using hydroponic culture. *BMC Genomics* **22**, 174.
- 654 **Yuan Y, Gao M, Zhang M, Zheng H, Zhou X, Guo Y, Zhao Y, Kong F, Li S.** 2017. QTL Mapping for  
655 Phosphorus Efficiency and Morphological Traits at Seedling and Maturity Stages in Wheat. *Frontiers*  
656 *in Plant Science* **8**.
- 657 **Zhang H, Wang H.** 2015. QTL mapping for traits related to P-deficient tolerance using three related  
658 RIL populations in wheat. *Euphytica* **203**, 505–520.



659 Supplementary Information

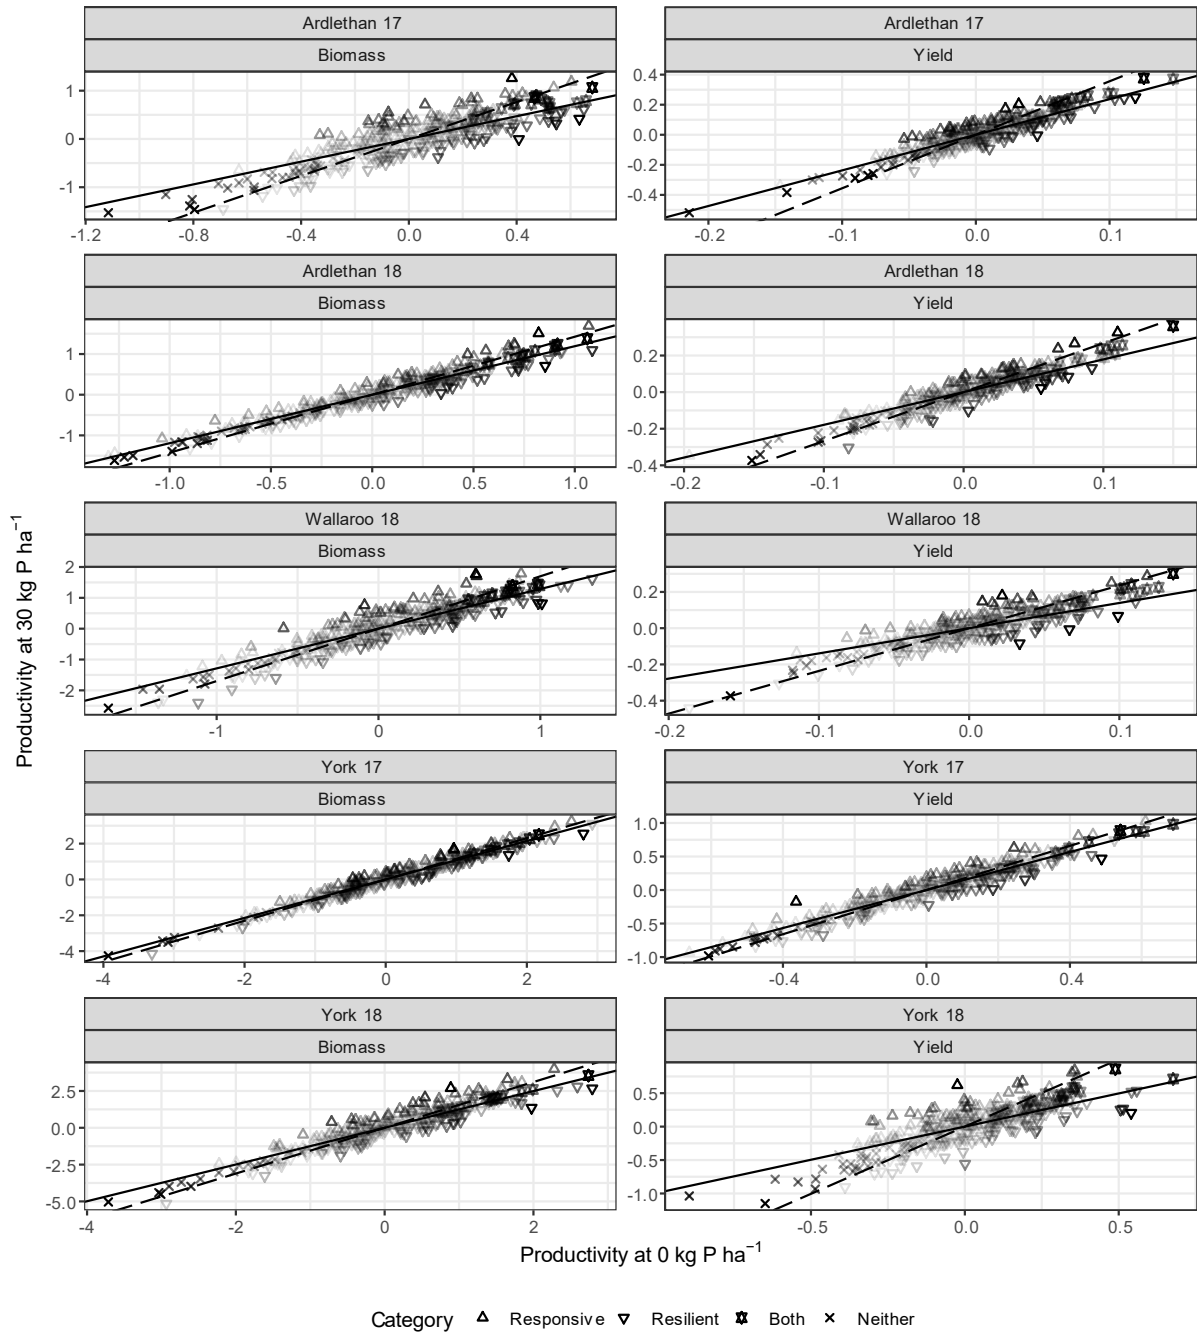

660 *Supplementary Figure 1. An expansion of Figure 4 to include all trials (vertical facets) and productivities (horizontal facets).*  
 661 *Yield at 0 kg P ha<sup>-1</sup> is plotted against yield at 30 kg P ha<sup>-1</sup>. Lines for the average genetic yield response to fertilisation (solid)*  
 662 *and average genetic yield resilience in the absence of fertilization (dashed) in this trial. The difference in response for each*  
 663 *genotype from the population average is its vertical distance (y-axis) from the average, i.e. the red line. The difference in*  
 664 *resilience for each genotype from the population average is its horizontal distance (x-axis) from the average, i.e. the blue line.*  
 665 *Each genotype has been categorised and coded by shape. If it is responsive, i.e. above the solid line, it is a triangle; if it is*  
 666 *resilient, i.e. right of the dashed line, it is an inverted triangle; if it is both resilient and responsive, i.e. above the solid line*  
 667 *and right of the dashed line, it is a star; and if it is neither resilient nor responsive, i.e. below the solid line and left of the*  
 668 *dashed line, it is a cross. The shading of the point indicates the degree of response and/or resilience, and highlights that the*  
 669 *measure is independent of yield at either P level. For the genotypes that are neither or both responsive and resilient the*  
 670 *shading is the average of the two measures and will increase with distance from the origin. The slope of the regression is*  
 671 *derived from a factor analytic model fitted across all five trials in the study and represents the genetic component of the*  
 672 *response; it does not reflect a regression of the BLUPs for the two P fertilization levels.*

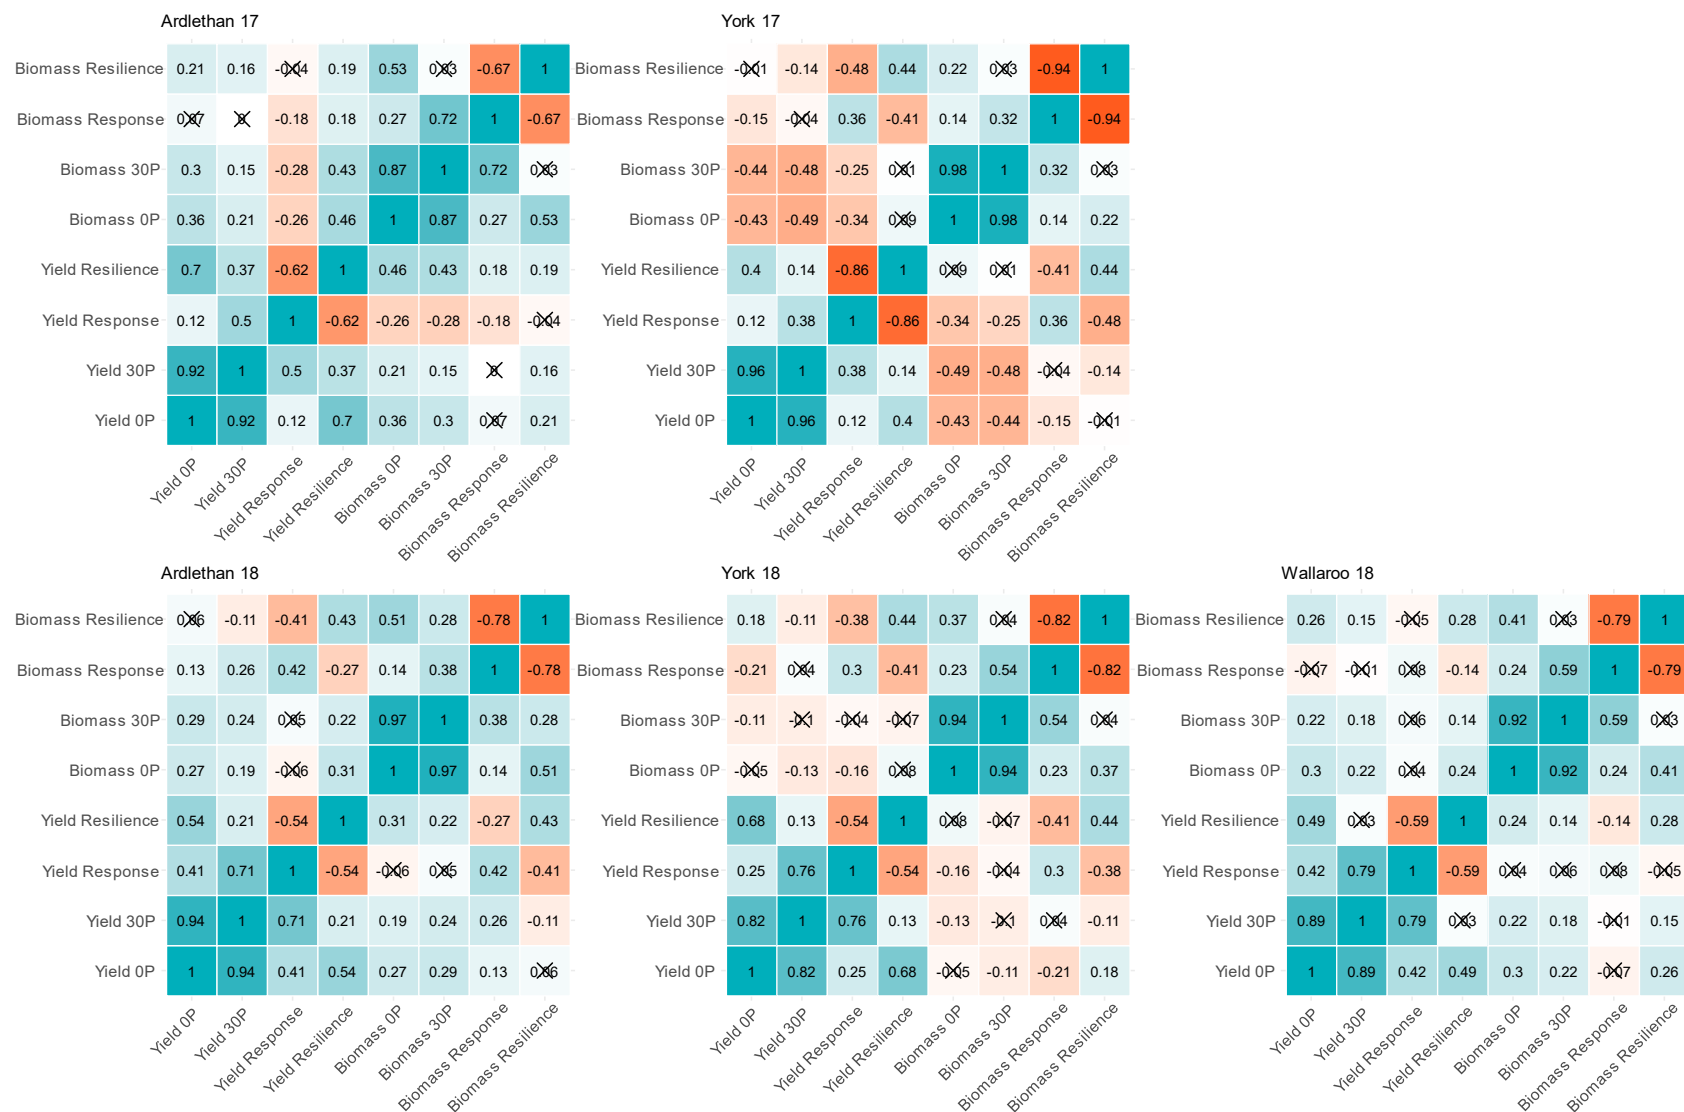

673 *Supplementary Figure 2. Correlograms for each BLUP faceted by each trial. Each tile is coloured and labelled by the size and direction of the correlation (Pearson correlation coefficient).*  
 674 *Correlations marked with a cross are insignificant.*
